# Supplementary material for: RBC-derived nanosystem with enhanced ferroptosis triggered by oxygen-boosted phototherapy for synergized tumor treatment
Source: Royal Society of Chemistry journal article supplement (doi:10.1039/d1bm00175b), 2021-01-01
Supplement: d1bm00175b1.pdf [file d1bm00175b1.pdf]

## Supporting Information

### **RBC-derived Nano-system with Enhanced Ferroptosis Triggered by Oxygen-Boosted Phototherapy for Synergized Tumor Treatment**

Wenjun Liu<sup>1†</sup>, Jieyuan Zhang<sup>2†</sup>, Liang Ding<sup>1</sup>, Weifeng Ni<sup>1</sup>, Junjie Yuan<sup>1</sup>, Haijun Xiao<sup>1\*</sup>, Jingwei Zhang<sup>1\*</sup>

<sup>1</sup> Department of Orthopedics, Shanghai Fengxian District Central Hospital / Southern Medical University Affiliated Fengxian Hospital, Shanghai 201499, China;

<sup>2</sup> Department of Orthopedics, Shanghai Sixth People's Hospital

\*E-mail: zx12orthopaedics@163.com

\*E-mail: xiaohaijun89@163.com

**TABLE OF CONTENTS**

**Figure S1 .....2**

**Figure S2 .....2**

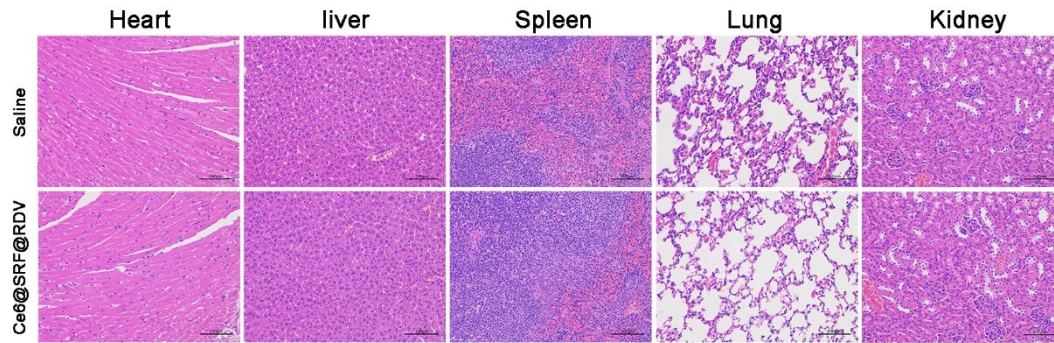

**Figure S1** H&E staining tissues of BALB/c nude mice after injecting saline and Ce6@SRF@RDV.

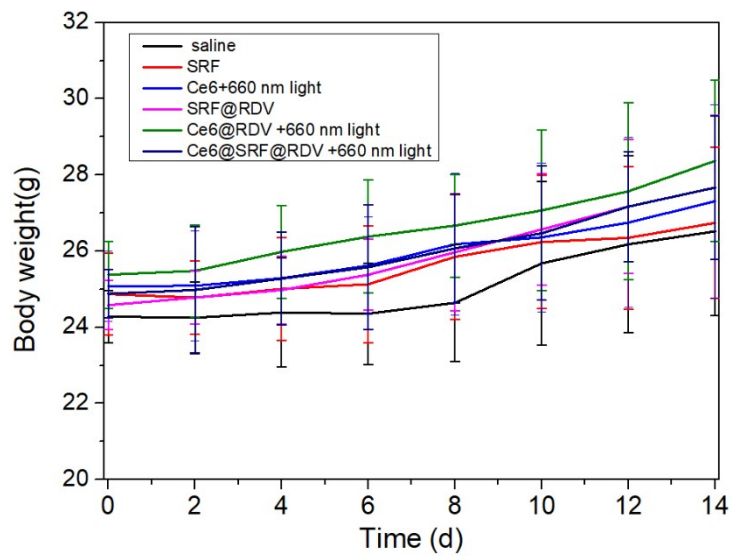

**Figure S2** The tumor weight of the mice with different treatments.
